# Supplementary material
Source: MDPI journal article supplement (https://www.mdpi.com/2673-6918/4/1/2)
Supplement: s1 [file s1]

# Hydroxyhydroquinone and Quassinoids as Promising Compounds with Hypoglycemic Activity through Redox Balance

Paulo R. dos Santos <sup>1</sup>, Sidinéia Danetti <sup>1</sup>, A. Joseph Rastegar <sup>2</sup>, Wellington V. de Souza <sup>2</sup>, Rafaele Frassini <sup>2</sup>, Fernando J. Scariot <sup>3</sup>, Sidnei Moura <sup>1</sup> and Mariana Roesch-Ely <sup>3,4,\*</sup>

<sup>1</sup> Laboratory of Biotechnology of Natural and Synthetics Products, University of Caxias do Sul, Caxias do Sul 95070-560, Brazil; prsantosquimica@gmail.com (P.R.d.S.); sidineiadanetti@gmail.com (S.D.); sidmoura@ucs.br (S.M.)

<sup>2</sup> Laboratory of Applied Toxicology and Bioproducts, University of Caxias do Sul, Caxias do Sul 95070-560, Brazil; joseph94301@gmail.com (A.J.R.); wvsouza2@ucs.br (W.V.d.S.); rfrassin@ucs.br (R.F.)

<sup>3</sup> Laboratory of Applied Microbiology, University of Caxias do Sul, Caxias do Sul 95070-560, Brazil; ferjscariot@gmail.com

<sup>4</sup> Institute of Biotechnology, University of Caxias do Sul, Caxias do Sul 95070-560, Brazil

\* Correspondence: mrely@ucs.br; Tel.: +55-54-3218-2100

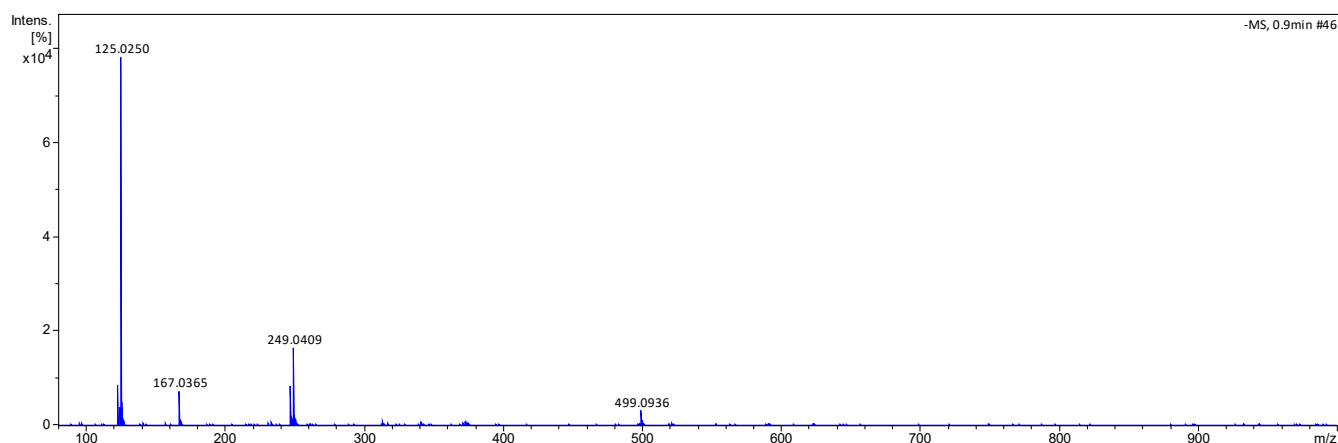

**Figure S1.** HRMS spectrum for HHQ compound obtained by ESI-TOF-MS in mode negative ions.

HHQ filtrado.1.fid  
HHQ filtrado 18-02-22

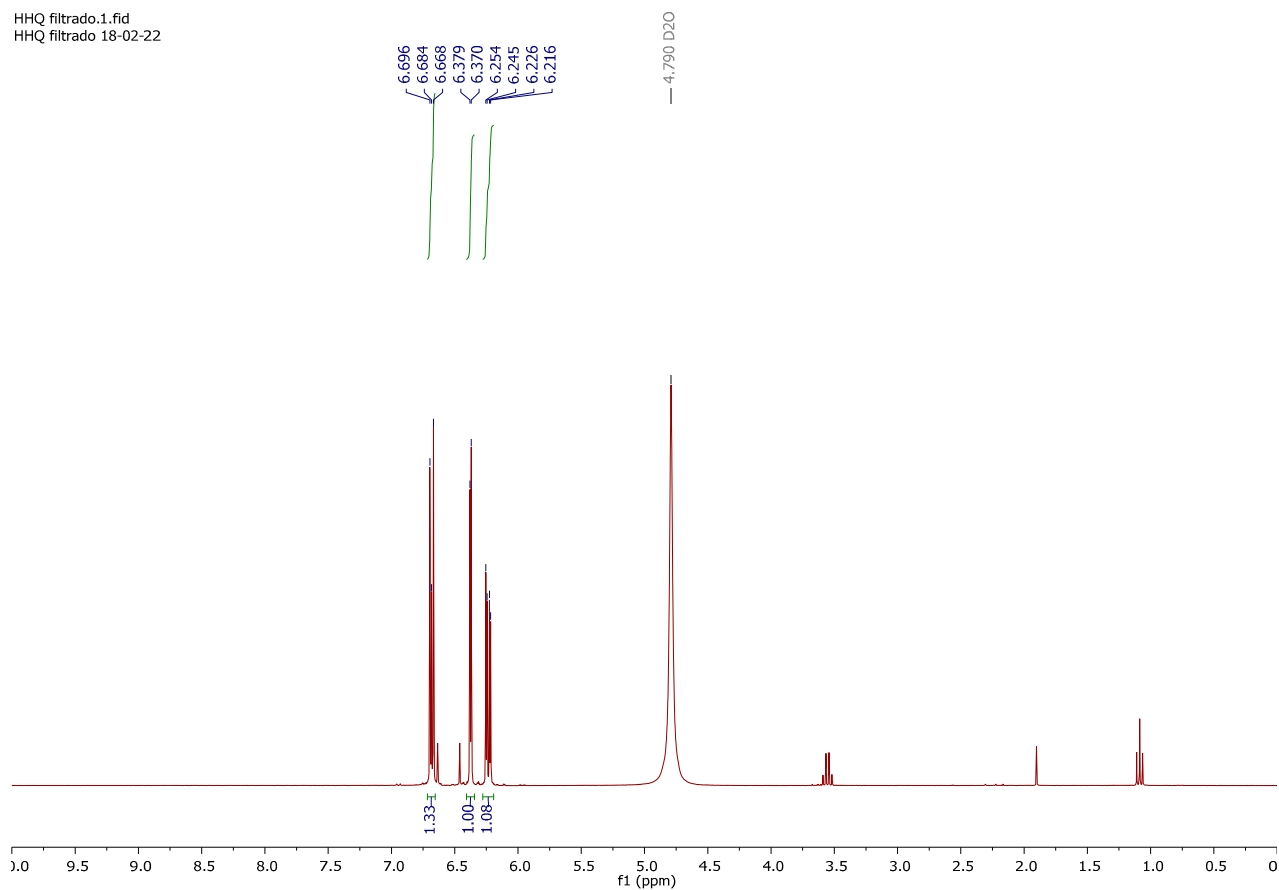

HHQ filtrado.2.fid  
HHQ filtrado 18-02-22

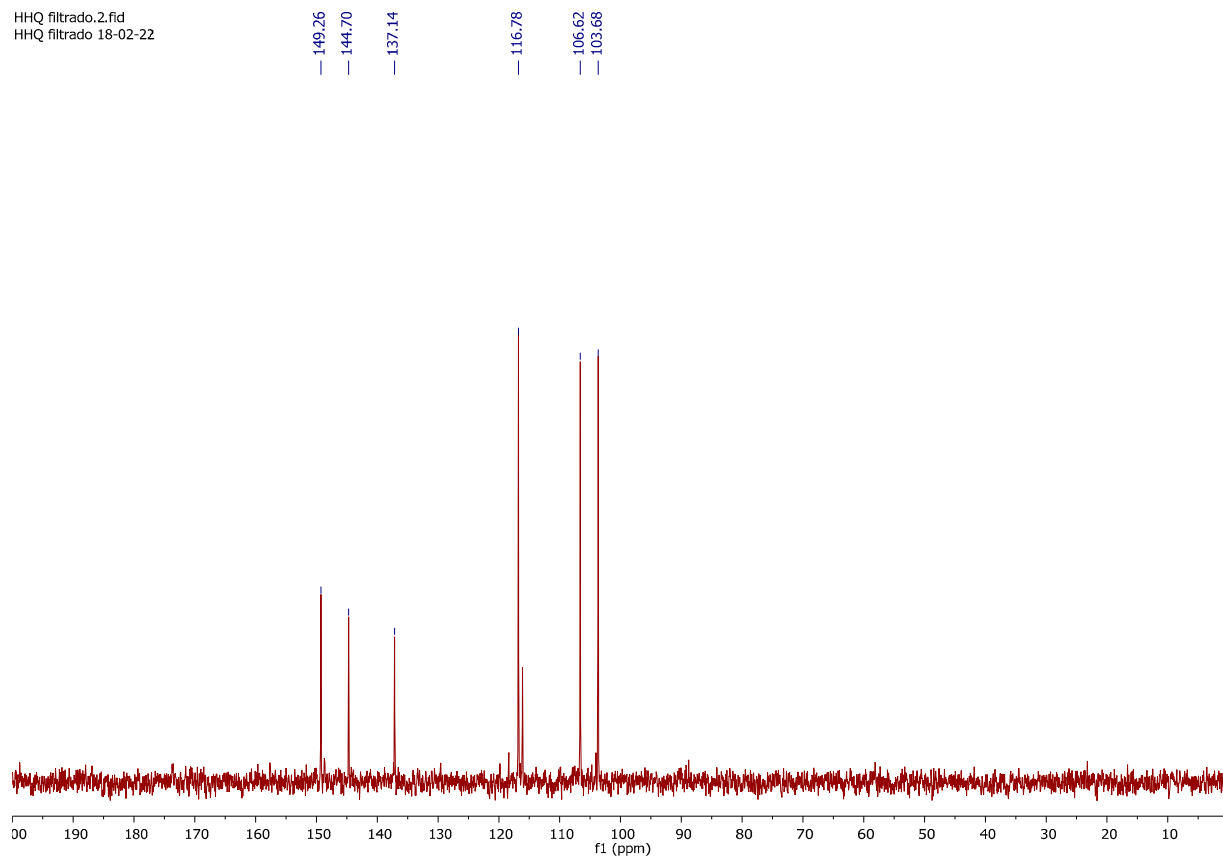

## Peak Analysis

Data Set:[Picrasma] "Picrasma crenata"!B

Date:06/11/2023

BaseLine:Constant

Chi^2=1,81718E+06

Adj. R-Square=9,59636E-01

# of Data Points=61187

SS=1,10864E+11

Degrees of Freedom=61009

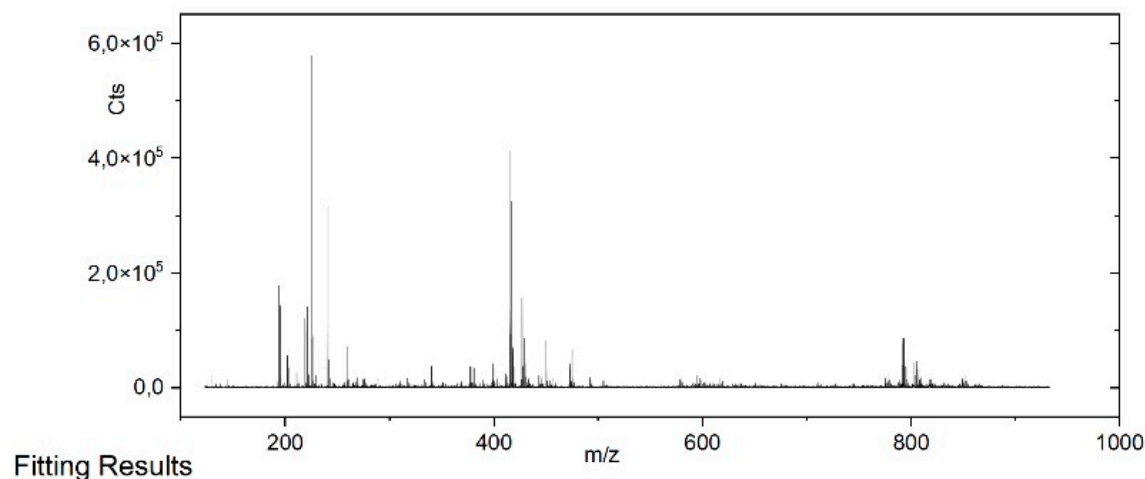

| Peak Index | Peak Type | Area Info   | FWHM    | Max Height   | Center Grav | Area InfoP |
|------------|-----------|-------------|---------|--------------|-------------|------------|
| 1          | Gaussian  | 2302.27535  | 0.02425 | 20062.71903  | 130.08542   | 0.87655    |
| 2          | Gaussian  | 9313.61455  | 0.03196 | 171727.07615 | 194.08327   | 3.54598    |
| 3          | Gaussian  | 0.31062     | 0.03205 | 145356.91551 | 195.09005   | 1.18262E-4 |
| 4          | Gaussian  | 141.13158   | 0.02979 | 20271.36692  | 196.09359   | 0.05373    |
| 5          | Gaussian  | 0.34139     | 0.03133 | 55322.66705  | 202.10647   | 1.29977E-4 |
| 6          | Gaussian  | 0.31113     | 0.03355 | 32669.6435   | 203.05204   | 1.18457E-4 |
| 7          | Gaussian  | 3277.43991  | 0.03496 | 25391.14551  | 211.08576   | 1.24783    |
| 8          | Gaussian  | 2219.62877  | 0.0339  | 118987.16199 | 219.02614   | 0.84508    |
| 9          | Gaussian  | 243.30535   | 0.036   | 139821.54838 | 221.06946   | 0.09263    |
| 10         | Gaussian  | 3041.58356  | 0.03597 | 22588.90179  | 222.07258   | 1.15803    |
| 11         | Gaussian  | 30.24501    | 0.0369  | 20645.48761  | 223.08375   | 0.01152    |
| 12         | Gaussian  | 73619.45708 | 0.03641 | 569154.91233 | 225.10168   | 28.02926   |
| 13         | Gaussian  | 104.79734   | 0.03563 | 88766.35331  | 226.10396   | 0.0399     |
| 14         | Gaussian  | 1597.75373  | 0.04201 | 19590.29471  | 229.09648   | 0.60832    |
| 15         | Gaussian  | 15.3547     | 0.03813 | 302292.36184 | 241.0968    | 0.00558    |
| 16         | Gaussian  | 2885.75906  | 0.04017 | 47761.32959  | 242.10072   | 1.0987     |
| 17         | Gaussian  | 317.86461   | 0.03753 | 71120.99695  | 259.10717   | 0.12102    |
| 18         | Gaussian  | 195.99954   | 0.04958 | 15505.31633  | 269.12628   | 0.07462    |
| 19         | Gaussian  | 0.79617     | 0.03846 | 17367.68803  | 289.01056   | 3.03129E-4 |
| 20         | Gaussian  | 4881.10584  | 0.04671 | 36424.77156  | 340.16472   | 1.85839    |
| 21         | Gaussian  | 1061.60044  | 0.05108 | 35521.92214  | 377.19565   | 0.40418    |
| 22         | Gaussian  | 221.61512   | 0.05041 | 34116.13011  | 379.20865   | 0.08438    |
| 23         | Gaussian  | 4469.20129  | 0.04803 | 32626.66642  | 381.0795    | 1.70157    |
| 24         | Gaussian  | 2886.4657   | 0.05781 | 40020.16367  | 399.17492   | 1.09897    |
| 25         | Gaussian  | 336.7054    | 0.06255 | 33752.16385  | 401.19058   | 0.12896    |
| 26         | Gaussian  | 1395.58328  | 0.04898 | 23924.14462  | 411.39598   | 0.53134    |
| 27         | Gaussian  | 1720.62842  | 0.08362 | 16938.38148  | 413.14198   | 0.74437    |
| 28         | Gaussian  | 36595.48523 | 0.05514 | 398913.5644  | 418.15146   | 13.93306   |
| 29         | Gaussian  | 316.38926   | 0.05307 | 92694.53929  | 418.15435   | 0.12045    |
| 30         | Gaussian  | 25833.33228 | 0.05688 | 317744.48317 | 417.16537   | 9.83557    |
| 31         | Gaussian  | 7159.82421  | 0.05525 | 70085.73108  | 418.16925   | 2.72597    |
| 32         | Gaussian  | 545.00494   | 0.06138 | 35657.09157  | 419.18774   | 0.2075     |
| 33         | Gaussian  | 623.38716   | 0.05404 | 153604.67381 | 427.1511    | 0.23734    |
| 34         | Gaussian  | 3418.1075   | 0.05324 | 36505.75349  | 428.15492   | 1.30138    |
| 35         | Gaussian  | 6122.30995  | 0.06467 | 81487.18897  | 429.16603   | 2.33099    |
| 36         | Gaussian  | 470.01155   | 0.07323 | 17736.85506  | 430.17297   | 0.17895    |
| 37         | Gaussian  | 1594.05334  | 0.0648  | 40725.50101  | 431.15168   | 0.60691    |
| 38         | Gaussian  | 2560.05513  | 0.05927 | 19050.25089  | 443.14646   | 0.97469    |
| 39         | Gaussian  | 112.36049   | 0.05755 | 18777.43283  | 446.22575   | 0.04278    |
| 40         | Gaussian  | 4196.17578  | 0.05542 | 80759.09045  | 449.35288   | 1.59762    |
| 41         | Gaussian  | 95.66248    | 0.05329 | 26959.32181  | 450.35588   | 0.03642    |
| 42         | Gaussian  | 760.37211   | 0.06209 | 41132.02321  | 473.1583    | 0.2895     |
| 43         | Gaussian  | 3019.01815  | 0.06069 | 63167.84516  | 475.1714    | 1.14944    |
| 44         | Gaussian  | 1773.06059  | 0.10785 | 15195.9645   | 476.19976   | 0.67506    |
| 45         | Gaussian  | 882.61783   | 0.06306 | 16676.05682  | 492.26047   | 0.33604    |
| 46         | Gaussian  | 665.85478   | 0.07901 | 19085.70796  | 595.21463   | 0.25351    |
| 47         | Gaussian  | 2527.76674  | 0.10505 | 19973.17843  | 777.37069   | 0.9624     |
| 48         | Gaussian  | 10636.43595 | 0.0896  | 82622.97508  | 791.33971   | 4.04963    |
| 49         | Gaussian  | 4058.59707  | 0.08858 | 37264.93138  | 792.34165   | 1.54524    |
| 50         | Gaussian  | 4554.69763  | 0.08875 | 84686.24508  | 793.35114   | 1.73412    |
| 51         | Gaussian  | 4426.66512  | 0.08824 | 36594.15989  | 794.35531   | 1.68537    |
| 52         | Gaussian  | 4002.45574  | 0.09362 | 36185.84103  | 795.36372   | 1.52386    |
| 53         | Gaussian  | 3972.59639  | 0.0939  | 41174.87963  | 803.33594   | 1.51249    |
| 54         | Gaussian  | 1188.9833   | 0.08989 | 19625.87143  | 804.34191   | 0.45268    |
| 55         | Gaussian  | 6001.15121  | 0.10158 | 43555.55378  | 805.3532    | 2.28483    |
| 56         | Gaussian  | 2034.16799  | 0.09587 | 19506.08516  | 806.35339   | 0.77447    |
| 57         | Gaussian  | 2365.52586  | 0.10169 | 30503.09369  | 807.34912   | 0.90063    |
| 58         | Gaussian  | 2174.08265  | 0.10001 | 15981.99318  | 809.35035   | 0.82774    |
| 59         | Gaussian  | 2583.04522  | 0.09582 | 19417.00492  | 851.35639   | 1.02152    |

Figure S4. Mass spectrum of P. crenata extract obtained by direct infusion on ESI-TOF MS.
